# Supplementary material for: Bronchoscopy versus an endotracheal tube mounted camera for the peri-interventional visualization of percutaneous dilatational tracheostomy - a prospective, randomized trial (VivaPDT)
Source: Springer Nature journal article supplement (doi:10.1186/s13054-017-1901-0), 2017-12-01
Supplement: MOESM1 [file 15334370]

**Additional File 1****Table S1:** Arterial blood gases and respiratory values (intention to treat analysis)

|                                | Timepoint 1      |                  | Timepoint 2       |                   |         | Timepoint 3        |                    |         |
|--------------------------------|------------------|------------------|-------------------|-------------------|---------|--------------------|--------------------|---------|
|                                | VivaSight™       | Bronchoscopy     | VivaSight™        | Bronchoscopy      | p       | VivaSight™         | Bronchoscopy       | p       |
| pH                             | 7.47 [7.45;7.50] | 7.44 [7.40;7.47] | 7.44 [7.41;7.47]* | 7.30 [7.27;7.34]* | < 0.001 | 7.37 [7.33;7.41]*# | 7.26 [7.22;7.30]** | < 0.001 |
| paO <sub>2</sub> [kPa]*        | 11.1 [10.0;12.2] | 11.0 [10.2;11.9] | 53.8 [45.9;59.3]* | 52.6 [44.7;60.5]* | ns      | 50.9 [42.1;58.3]*  | 51.3 [43.5;59.1]*  | ns      |
| paCO <sub>2</sub> [kPa]        | 5.0 [4.6;5.3]    | 5.3 [4.7;5.9]    | 5.4 [5.1;5.8]     | 7.6 [6.7;8.4]*    | < 0.001 | 6.6 [5.9;7.0]**    | 8.3 [7.2;9.5]**    | < 0.001 |
| Lactat [mmol*L <sup>-1</sup> ] | 0.9 [0.7;1.1]    | 1.0 [0.7;1.3]    | 0.8 [0.6;1.0]     | 0.9 [0.6;1.2]     | ns      | 0.8 [0.6;1.0]      | 0.8 [0.6;1.1]      | ns      |
| Hb [g/dl]                      | 8.8 [8.3;9.2]    | 9.0 [8.4;9.5]    | 8.6 [8.2;9.1]     | 8.9 [8.3;9.6]     | ns      | 8.6 [8.2;9.0]      | 9.0 [8.3;9.6]      | ns      |
| SaO <sub>2</sub> [%]           | 97 [96;98]       | 96 [96;97]       | 96 [88;105]       | 100 [100-100]     | ns      | 100 [99;101]       | 100 [100-101]      | ns      |
| Paw [hPa]                      | 21 [19;24]       | 21 [19;23]       | 23 [20;25]        | 23 [21;26]        | ns      | 22 [21;25]         | 23 [21;25]         | ns      |
| PEEP [hPa]                     | 7 [6;9]          | 7 [6;8]          | 7 [6;9]           | 7 [6;7]           | ns      | 7 [6;9]            | 7 [6;7]            | ns      |
| etCO <sub>2</sub> [kPa]        | 4.9 [4.6;5.2]    | 4.6 [4.1;5.1]    | 4.7 [4.4;5.1]     | 4.5 [3.6;5.4]     | ns      | 5.6 [5.0;6.2] #    | 6.4 [5.8;7.1]**    | 0.031   |
| V <sub>T</sub> [ml]            | 436 [358;539]    | 446 [386;512]    | 476 [326;679]     | 250 [148;371]*    | 0.002   | 468 [382;598]      | 380 [257;465]      | ns      |
| MV [l*min <sup>-1</sup> ]      | 8.4 [7.3;9.5]    | 9.6 [8.0;11.3]   | 6.8 [5.4;8.3]     | 3.5 [2.5;4.8]*    | 0.001   | 9.2 [7.1;11.8]#    | 6.3 [4.8;7.8]**    | 0.005   |
| C [ml*hPa <sup>-1</sup> ]      | 53 [42;67]       | 57 [41;72]       | 32 [24;38]*       | 24 [7;34]*        | ns      | 44 [29;60]         | 29 [22;38]*        | 0.05    |
| RR [min <sup>-1</sup> ]        | 18 [16;20]       | 20 [17;23]       | 19 [17;20]        | 20 [18;22]        | ns      | 19 [16;21]         | 21 [18;23]         | ns      |
| FiO <sub>2</sub>               | 0.29 [0.25;0.31] | 0.32 [0.25;0.39] | 0.99 [0.97;1.01]* | 0.99 [0.97;1.01]* | ns      | 0.99 [0.97;1.01]*  | 0.99 [0.97;1.01]*  | ns      |
| SpO <sub>2</sub> [%]           | 98 [97;99]       | 96 [95;98]       | 100 [100;100]*    | 100 [99;100]*     | ns      | 100 [99;100]*      | 99 [99;100]*       | ns      |
| MAP [mmHg]                     | 84 [76;92]       | 83 [76; 90]      | 92 [84;100]*      | 81 [74;88]        | 0.019   | 89 [82;96]         | 86 [81;93]         | ns      |

Data are shown as the mean and 95% confidence intervals, timepoint 1: before start of intervention, timepoint 2: before tracheal cannulation, timepoint 3: after insertion of tracheal cannula, paO<sub>2</sub>: arterial partial pressure of oxygen, paCO<sub>2</sub>: arterial partial pressure of carbon dioxide, SaO<sub>2</sub>: arterial saturation of oxygen, Paw: airway pressure, PEEP: positive end expiratory pressure, etCO<sub>2</sub>: end tidal carbon dioxide tension, V<sub>T</sub>: tidal volume, MV: minute ventilation, C: compliance, RR: respiratory rate, FiO<sub>2</sub>: fraction of inspired oxygen, SpO<sub>2</sub>: pulse oxymetric saturation of oxygen; statistical analysis was done with linear mixed models, p values in columns indicate difference between VivaSight and bronchoscopy groups at the respective timepoint; analysis of variables between timepoints: \* p < 0.05 vs. timepoint 1, # p < 0.05 vs. timepoint 2, ns: not statistically significant.
