# Supplementary material for: Bronchoscopy versus an endotracheal tube mounted camera for the peri-interventional visualization of percutaneous dilatational tracheostomy - a prospective, randomized trial (VivaPDT)
Source: Springer Nature journal article supplement (doi:10.1186/s13054-017-1901-0), 2017-12-01
Supplement: MOESM2 [file 15334370]

**Additional File 2****Table S2: Analysis of score values**

| score item    | ITT            |               |                  |        | PP            |               |                  |        |
|---------------|----------------|---------------|------------------|--------|---------------|---------------|------------------|--------|
|               | VST            | bronchoscopy  | mean difference  | p      | VST           | bronchoscopy  | mean difference  | p      |
| Visualisation | 5.9 [4.7;7.1]  | 4.0[4.0;4.0]  | 1.9 [0.7;3.1]    | 0.003  | 5.4 [4.5;6.3] | 4.0[4.0;4.0]  | 1.4 [0.5;2.3]    | 0.005  |
| Ventilation   | 2.8 [2.3;3.3]  | 5.0 [4.4;5.7] | -2.3 [-3.0;-1.5] | <0.001 | 2.5 [2.1;2.9] | 5.0 [4.4;5.7] | -2.5 [-3.2;-1.8] | <0.001 |
| total         | 8.7 [7.6;9.8]  | 9.0 [8.4;9.7] | -0.3 [-1.6;0.9]  | ns     | 7.9 [7.0;8.9] | 9.0 [8.4;9.7] | -1.1 [-2.2;0]    | ns     |
| A             | 1.2 [1.0;1.5]  | 1.0 [1.0;1.0] | 0.2 [-0.4;0.5]   | ns     | 1.2 [0.9;1.5] | 1.0 [1.0;1.0] | 0.2 [-0.1;0.5]   | ns     |
| B             | 1.6 [1.3;.1.9] | 1.0 [1.0;1.0] | 0.6 [0.3;0.9]    | <0.001 | 1.5 [1.3;1.8] | 1.0 [1.0;1.0] | 0.5 [0.2;0.8]    | 0.001  |
| C             | 1.5 [1.1;2.0]  | 1.0 [1.0;1.0] | 0.5 [0.1;1.0]    | ns     | 1.2 [1.0;1.4] | 1.0 [1.0;1.0] | 0.2 [0;0.4]      | ns     |
| D             | 1.6 [1.2;2.0]  | 1.0 [1.0;1.0] | 0.6 [0.2;1.0]    | 0.006  | 1.5 [1.2;1.8] | 1.0 [1.0;1.0] | 0.5 [0.2;0.8]    | 0.004  |
| E1            | 1.3 [1.0;1.5]  | 2.4 [2.1;2.8] | -1.2 [-1.6;-0.7] | <0.001 | 1.2 [1.0;1.4] | 2.4 [2.1;2.8] | -1.2 [-1.7;-0.8] | <0.001 |
| E2            | 1.5 [1.2;1.8]  | 2.6 [2.3;3.0] | -1.1 [-1.5;-0.6] | <0.001 | 1.3 [1.1;1.6] | 2.6 [2.3;3.0] | -1.3 [-1.7;-0.9] | <0.001 |

values are shown as mean and 95% confidence intervals in brackets; ITT: intention to treat analysis; PP: per protocol analysis; score items as given in table 1; analysis by Welch-test.
