# Supplementary material for: Bronchoscopy versus an endotracheal tube mounted camera for the peri-interventional visualization of percutaneous dilatational tracheostomy - a prospective, randomized trial (VivaPDT)
Source: Springer Nature journal article supplement (doi:10.1186/s13054-017-1901-0), 2017-12-01
Supplement: MOESM3 [file 15334370]

**Additional File 3**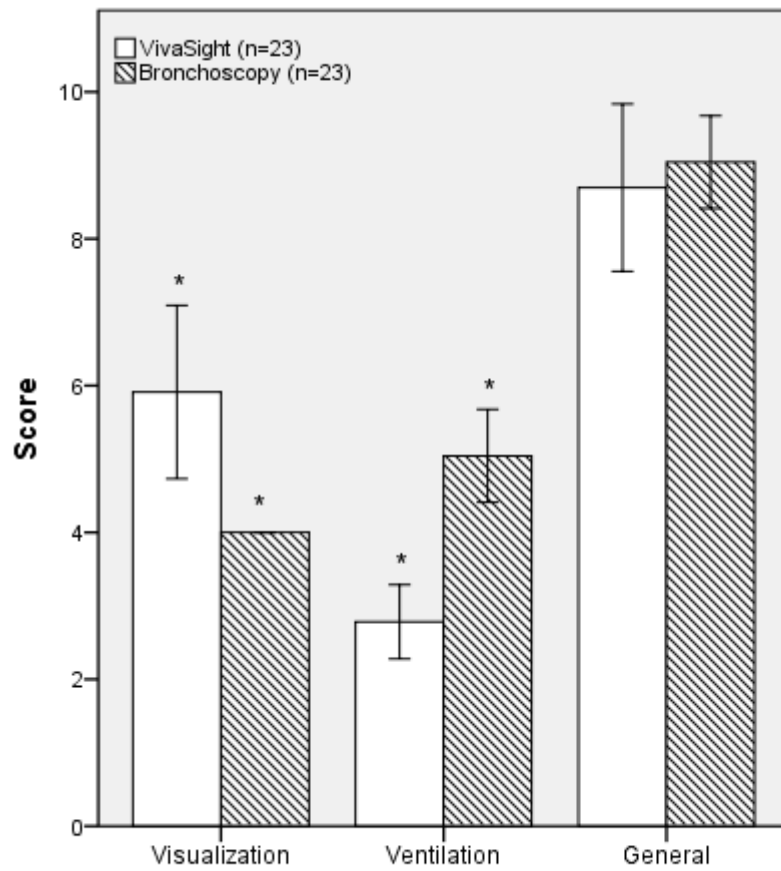

**Figure S1:** Rating of visualization and ventilation according to score (intention to treat analysis)

Lower scores indicate better performance. Error bars indicate 95% confidence intervals.
