# Supplementary material for: Bronchoscopy versus an endotracheal tube mounted camera for the peri-interventional visualization of percutaneous dilatational tracheostomy - a prospective, randomized trial (VivaPDT)
Source: Springer Nature journal article supplement (doi:10.1186/s13054-017-1901-0), 2017-12-01
Supplement: MOESM4 [file 15334370]

**Additional File 4**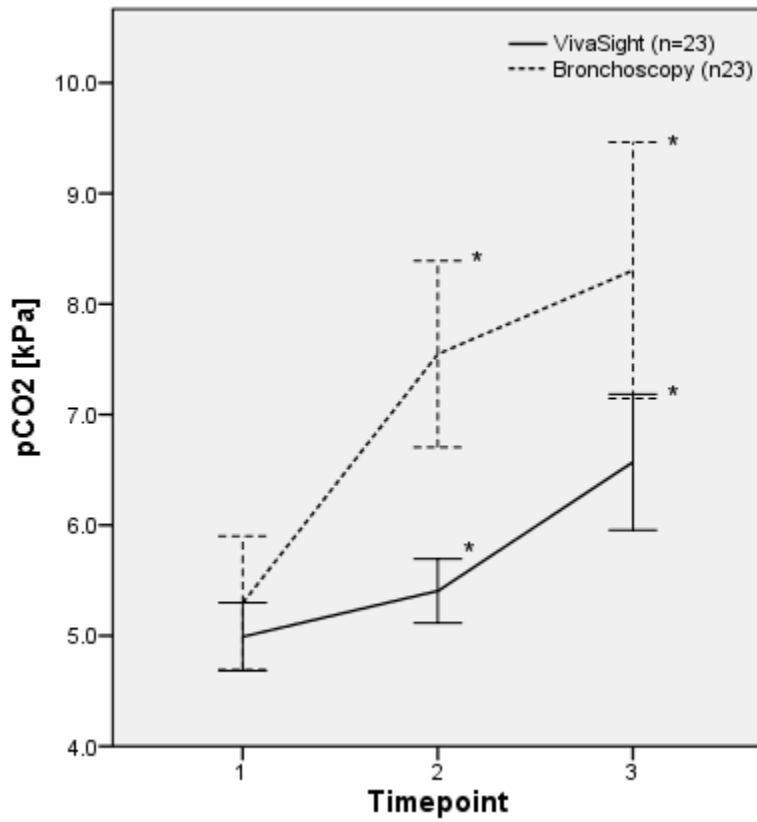

**Figure S2:** Changes in paCO<sub>2</sub> (intention to treat analysis)

Timepoint 1: before start of intervention, timepoint 2: before tracheal cannulation, timepoint 3: after insertion of tracheal cannula. Error bars indicate 95% confidence intervals. \* p<0.05 for difference of groups at respective timepoint.
